# Supplementary material
Source: Springer Nature journal article supplement (https://www.springermedizin.de/resource/supplementary/12943_2009_516_MOESM4_ESM.pdf/9554404)

# Ad/AH

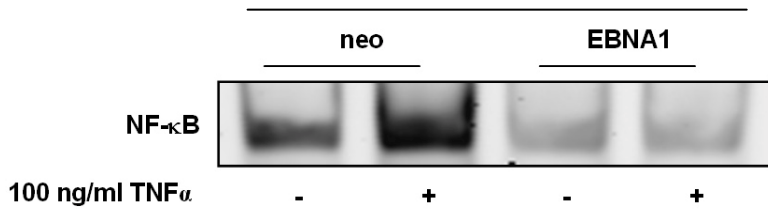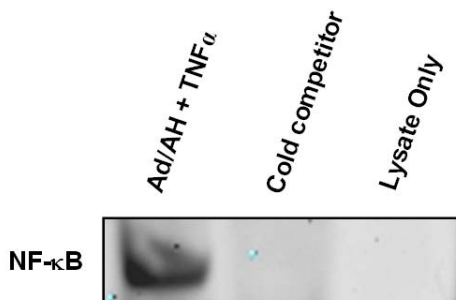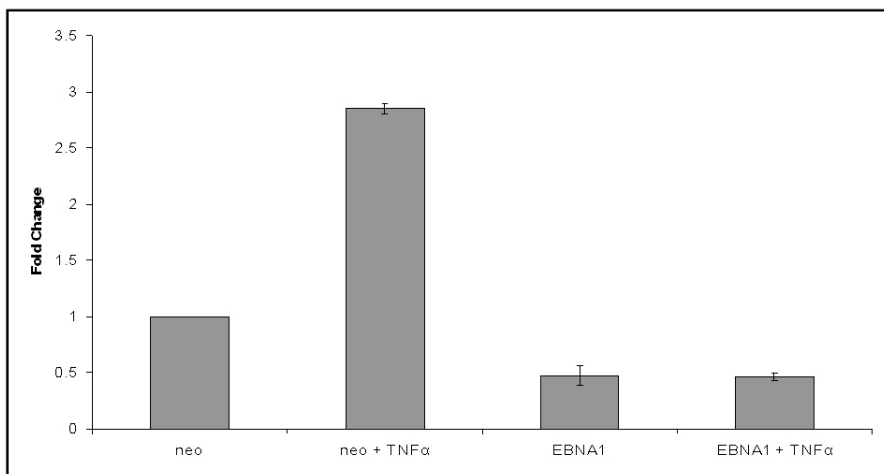

Supplement: MOESM4 [file 9554404]
